# Supplementary material for: Cyclic fatigue resistance of EdgeTaper Platinum, Protaper Gold, and TruNatomy Prime rotary files before and after autoclave sterilization
Source: PeerJ. 2023 Jan 20;11:e14656. doi: 10.7717/peerj.14656 (PMC9869776; doi:10.7717/peerj.14656)
Supplement: Data S1 [file peerj-11-14656-s002.xlsx]

## Sheet: Sheet1
No.	Cycle	NiTi	time to fracture			Fractured tip length	time in sec	time in sec	cycles to failure
			min	sec	ms	mm
[000	0	TN	1	32	85	4.33	92	93	775
[001	0	TN	1	37	69	2.67	97	98	816.667
[002	0	TN	2	30	15	4.8	150	150	1250
[011	1	TN	4	31	74	3.5	271	272	2266.67
[012	1	TN	2	15	79	3.97	135	136	1133.33
[013	1	TN	1	40	49	3.78	100	100	833.333
[014	1	TN	1	34	91	4.15	94	95	791.667
[015	1	TN	1	22	57	3.81	82	82	683.333
[051	5	TN	5	54	23	3.93	354	354	2950
[052	5	TN	5	54	61	2.88	354	355	2958.33
[053	5	TN	4	50	68	2.14	290	291	2425
[054	5	TN	1	16	57	3.5	76	77	641.667
[055	5	TN	1	53	74	3.4	113	114	950
[0101	10	TN	1	30	79	4.12	90	91	758.333
[0102	10	TN	1	38	88	2.63	98	99	825
[0103	10	TN	2	24	89	2.65	144	145	1208.33
[0104	10	TN	7	32	37	4.13	452	452	3766.67
[0105	10	TN	1	25	67	2.47	85	86	716.667
100	0	PTG	4	47	51	3.17	287	287	1435
101	0	PTG	4	32	22	3.01	272	272	1360
102	0	PTG	4	23	58	3.16	263	263	1315
[111	1	PTG	5	58	31	2.81	358	358	1790
[112	1	PTG	4	53	5	3.08	293	293	1465
[113	1	PTG	3	43	11	2.93	223	223	1115
[114	1	PTG	2	50	83	3.16	170	171	855
[115	1	PTG	4	14	22	3.32	254	254	1270
[151	5	PTG	4	22	77	2.84	262	263	1315
[152	5	PTG	4	22	16	3.58	262	262	1310
[153	5	PTG	3	26	21	3.15	206	206	1030
[154	5	PTG	3	37	1	3.19	217	217	1085
[155	5	PTG	5	0	0	3.37	300	300	1500
[1101	10	PTG	3	48	21	3.15	228	228	1140
[1102	10	PTG	4	40	45	2.85	280	280	1400
[1103	10	PTG	4	8	33	3.04	248	248	1240
[1104	10	PTG	4	43	61	3.28	283	283	1415
[1105	10	PTG	5	34	32	4.49	334	334	1670
200	0	ETP	7	39	27	3.11	459	459	2295
201	0	ETP	5	46	16	3.46	346	346	1730
201	0	ETP	9	21	29	4.01	561	561	2805
[211	1	ETP	21	32	25	4.12	1292	1292	6460
[212	1	ETP	24	30	17	4.14	1470	1470	7350
[213	1	ETP	21	23	63	5.25	1283	1284	6420
[214	1	ETP	16	24	93	4.28	984	985	4925
[215	1	ETP	32	24	51	5.08	1944	1944	9720
[251	5	ETP	14	45	74	4.11	885	886	4430
[252	5	ETP	18	24	58	4.31	1104	1104	5520
[253	5	ETP	17	57	27	3.63	1077	1077	5385
[254	5	ETP	20	37	85	4.02	1237	1238	6190
[255	5	ETP	14	45	8	3.63	885	886	4430
[2101	10	ETP	77	47	52	4.86	4667	4667	23335
[2102	10	ETP	23	55	28	4.11	1435	1435	7175
[2103	10	ETP	19	33	35	5.33	1173	1173	5865
[2104	10	ETP	31	30	24	3.78	1890	1890	9450
[2105	10	ETP	18	34	66	4.36	1114	1115	5575
